# Supplementary material for: Understanding Pedestrian Interactive Behaviors under the Different Level of Services on Stairways
Source: Hindawi journal article supplement (doi:10.1155/2019/2015671), 2019-06-27
Supplement: f1 [file 2015671.f1.xlsx]

## Sheet: On ascending stairway
Macro characteristics of overtaking beahvior on ascending stairway				Micro distance characteristics of overtaking beahvior on ascending stairway					Characteristics of sideways overtaking beahvior
Density(p/m^2)	Number of events	Intensity (number/min）		Longitudinal distance (cm)	Horizontal distance (cm)	Density (p/m^2)			Density(p/m^2)	sideways events	All events	Proportion
0~0.15	0	0		205	70	0.24694			0~0.15	0	0	0
0.15~0.3	1	0.13		65	75	0.24694			0.15~0.3	1	3	0.333
0.3~0.45	8	1.33		65	75	0.24694			0.3~0.45	1	16	0.063
0.45~0.6	13	2.36		135	105	0.334473			0.45~0.6	0	21	0
0.6~0.75	19	4.85		30	80	0.371465			0.6~0.75	1	26	0.038
0.75~0.9	17	5.37		30	95	0.371465			0.75~0.9	1	31	0.032
0.9~1.05	37	6.17		75	70	0.371465			0.9~1.05	11	43	0.256
1.05~1.2	10	4.8		80	90	0.371465			1.05~1.2	6	13	0.462
1.2~1.35	5	2.14		145	90	0.371465			1.2~1.35	6	11	0.545
1.35~1.5	2	1.5		120	115	0.445511			1.35~1.5	3	4	0.75
1.5~1.65	3	1.8		100	75	0.445647			1.5~1.65	4	5	0.8
1.65~1.8	1	0.86		120	70	0.445647			1.65~1.8	2	2	1
1.8~1.95	1	1.09		80	85	0.445647			1.8~1.95	1	1	1
1.95~2.1	2	1.04		130	80	0.445647			1.95~2.1	2	2	1
2.1~2.25	1	1.09		140	100	0.445647			≥2.1	5	5	1
2.25~2.4	0	0		140	135	0.494935			Total	44	183	0.24
2.4~2.55	0	0		125	85	0.494935
2.55~2.7	0	0		80	100	0.494935
2.7~2.85	0	0		135	70	0.494935
2.85~3	0	0		100	90	0.494935
3~3.15	0	0		115	60	0.494935
3.15~3.3	0	0		105	45	0.495058
>3.3	0	0		90	65	0.556822
				120	80	0.556822
				125	80	0.556822
				120	115	0.556822
				110	105	0.556822
				120	60	0.556888
				95	55	0.556888
				100	45	0.556888
				110	90	0.618406
				75	85	0.618406
				120	70	0.667996
				100	75	0.667996
				90	95	0.667996
				85	75	0.667996
				75	70	0.667996
				105	55	0.668266
				70	40	0.668266
				80	65	0.668266
				95	85	0.668266
				95	85	0.668266
				120	90	0.668266
				90	65	0.741876
				95	65	0.741876
				95	105	0.741876
				110	60	0.742112
				100	120	0.77917
				75	65	0.77917
				50	65	0.77917
				85	65	0.77917
				105	70	0.77917
				80	75	0.779644
				55	80	0.779644
				100	120	0.779644
				75	85	0.779644
				95	80	0.865346
				95	100	0.865346
				100	95	0.865346
				80	75	0.865346
				75	100	0.865346
				105	70	0.865639
				85	85	0.865639
				75	75	0.891021
				60	95	0.891021
				95	90	0.891021
				70	65	0.891021
				60	85	0.891295
				85	65	0.891295
				65	75	0.989871
				80	85	0.989871
				80	85	0.989871
				60	35	1.0024
				100	55	1.0024
				100	100	1.0024
				65	105	1.0024
				95	85	1.00247
				75	70	1.00247
				40	110	1.11334
				100	75	1.11364
				100	40	1.11364
				70	40	1.11364
				115	60	1.11378
				75	70	1.23681
				102	55	1.23681
				80	50	1.23681
				65	30	1.23681
				102	55	1.23681
				80	50	1.23681
				65	30	1.23681
				80	65	1.23717
				80	55	1.23717
				40	55	1.33694
				105	50	1.36028
				75	35	1.3607
				50	40	1.85576
				95	30	2.10321
				95	30	2.10321

## Sheet: On descending stairway
Macro characteristics of overtaking beahvior on descending stairway				Micro distance characteristics of overtaking beahvior on descending stairway
Density(p/m^2)	Number of events	Intensity (number/min）		Longitudinal distance (cm)	Horizontal distance (cm)	Density (p/m^2)
0~0.15	0	0		120	60	0.211888
0.15~0.3	1	0.41		120	70	0.212102
0.3~0.45	8	1.12		185	115	0.289783
0.45~0.6	13	2.46		90	70	0.317832
0.6~0.75	19	2.27		95	70	0.317832
0.75~0.9	17	1.71		85	55	0.423776
0.9~1.05	37	1.29		100	55	0.423776
1.05~1.2	10	0.73		80	60	0.424204
1.2~1.35	5	0.69		95	30	0.482971
1.35~1.5	2	0.44		85	100	0.482971
1.5~1.65	3	0.75		95	75	0.482971
1.65~1.8	1	0.19		140	80	0.482971
1.8~1.95	1	0		115	75	0.530255
1.95~2.1	2	0		70	60	0.530769
2.1~2.25	1	0		70	80	0.530769
2.25~2.4	0	0.18		65	70	0.530769
2.4~2.55	0	0		95	60	0.579566
2.55~2.7	0	0		105	75	0.579566
2.7~2.85	0	0.41		125	75	0.579566
2.85~3	0	0.08		100	50	0.636306
3~3.15	0	0		65	50	0.636713
3.15~3.3	0	0		125	65	0.636713
>3.3	0	0		105	95	0.67616
				100	60	0.67616
				95	35	0.742357
				85	65	0.742657
				85	70	0.742657
				50	85	0.742657
				75	55	0.772754
				100	70	0.772754
				100	80	0.772754
				80	45	0.772754
				95	70	0.846503
				105	55	0.869349
				70	50	0.954545
				75	60	0.954545
				75	60	0.965943
				80	60	1.06049
				25	55	1.06049
				75	45	1.06049
				55	50	1.06049
				90	60	1.15913
				80	65	1.15913
				75	60	1.16643
				85	55	1.16656
				50	30	1.16656
				50	40	1.17587
				85	60	1.25573
				80	55	1.37832
				110	70	1.37832
				80	65	1.48427
				55	40	1.59076
				50	55	1.80315
				125	45	2.02848

## Sheet: Evasive behaivor
Macro characteristics of evasive beahvior				Micro distance characteristics of evasive beahvior				Characteristics of sideways evasive beahvior
Density(p/m^2)	Number of events	Intensity (number/min）		Longitudinal distance (cm)	Horizontal distance (cm)	Density (p/m^2)		Density(p/m^2)	sideways events	All events	Proportion
0~0.15	0	0		285	80	0.193189		0~0.15	0	0	-
0.15~0.3	2	2.4		350	65	0.211888		0.15~0.3	0	2	0
0.3~0.45	5	1.88		300	115	0.334133		0.3~0.45	2	5	0.4
0.45~0.6				315	70	0.386377		0.45~0.6	1	10	0.1
0.6~0.75	9	2.57		275	75	0.445511		0.6~0.75	5	9	0.5556
0.75~0.9	8	1.96		245	85	0.445647		0.75~0.9	4	8	0.5
0.9~1.05	25	2.54		275	110	0.445647		0.9~1.05	15	25	0.6
1.05~1.2	10	2.35		215	80	0.494935		1.05~1.2	6	10	0.6
1.2~1.35	15			245	100	0.494935		1.2~1.35	14	15	0.9333
1.35~1.5	10	2.14		245	100	0.494935		1.35~1.5	9	10	0.9
1.5~1.65	5	1.05		140	60	0.52972		1.5~1.65	5	5	1
1.65~1.8	3	0.78		265	65	0.530769		1.65~1.8	3	3	1
1.8~1.95	3	0.5		370	60	0.530769		1.8~1.95	3	3	1
1.95~2.1	9	0.68		195	80	0.556822		1.95~2.1	9	9	1
2.1~2.25	3	0.4		200	100	0.556888		≥2.1	8	8	1
2.25~2.4	2	0.39		305	100	0.556888		Total	84	122	0.6885
2.4~2.55	1	0.19		240	65	0.667996
2.55~2.7	0	0		295	100	0.667996
2.7~2.85	0	0		175	90	0.667996
2.85~3	1	0.17		120	90	0.741876
3~3.15	1	0.29		150	45	0.741876
3.15~3.3	0	0		260	80	0.77917
>3.3	0	0		150	100	0.77917
				235	90	0.77917
				275	85	0.77917
				225	95	0.77917
				185	80	0.779644
				205	90	0.779644
				130	60	0.848601
				170	45	0.865346
				135	85	0.865346
				195	30	0.865346
				260	70	0.891021
				225	80	0.891295
				265	65	0.891295
				195	90	0.891295
				185	65	0.891295
				230	50	0.954545
				220	45	0.989166
				280	65	0.989871
				115	55	0.989871
				155	65	0.989871
				155	65	0.989871
				185	75	1.00247
				200	70	1.00247
				310	60	1.0648
				200	40	1.06254
				205	40	1.10806
				170	50	1.11334
				130	35	1.11334
				170	45	1.11334
				170	45	1.11334
				170	75	1.11378
				205	65	1.11378
				175	65	1.15913
				215	40	1.16656
				145	35	1.16656
				125	50	1.17587
				165	70	1.22482
				135	70	1.22482
				200	60	1.22515
				210	50	1.23681
				140	20	1.23681
				155	35	1.23681
				165	45	1.23681
				175	30	1.23681
				175	50	1.27238
				90	70	1.28747
				175	55	1.33653
				115	30	1.36028
				155	55	1.37832
				140	75	1.48422
				180	40	1.48481
				100	45	1.48481
				120	35	1.48427
				140	55	1.55929
				165	60	1.60775
				225	40	1.60828
				215	45	1.60828
				145	35	1.60828
				125	75	1.67046
				105	55	1.73128
				85	25	1.73175
				85	25	1.73175
				140	40	1.78164
				155	60	1.78204
				185	50	1.83529
				125	60	1.85576
				175	30	1.90892
				100	70	1.97928
				135	35	1.97928
				205	60	2.01497
				155	40	2.01503
				85	30	2.10281
				225	40	2.12507
				90	35	2.22634
